# Supplementary material
Source: publisher site journal article supplement (https://www.dovepress.com/article/439219)
Supplement: Supplementary file 1 [file get_supplementary_file.php]

# Supplementary material of methods

Person-level linked data for the study were obtained from the Clinical Practice Research Datalink (CPRD) and Hospital Episode Statistics (HES). The CPRD contains records from general practices in the United Kingdom, and 57% of the practices have agreed to linkage to other data sources.1 The CPRD records include clinical consultation details, diagnoses defined by Read codes, information on lifestyle factors, biochemical tests, medical prescriptions, and date of death. Data quality is maintained by the CPRD for criteria of patient acceptability and practice up-to-standard time. HES contains information on dates of hospital admission and discharge and discharge diagnoses according to the International Classification of Diseases 10th edition (ICD-10). Deprivation data are defined by quintiles of Index of Multiple Deprivation (IMD) based on the average socioeconomic status in smaller areas containing around 150 dwellings, i.e., Lower-layer Super output areas. Each patient is assigned an IMD score given in quintiles and based on the average score in the patient’s residence area.

We identified a population of all patients who were permanently registered in the CPRD, acceptable for research, and eligible for linkage between 1 January 2005 and 31 July 2017. A patient was only considered for study inclusion after the data was first up-to-standard for the patient’s general practice, and if the patient had been registered with the general practice for at least 12 months.

The autoimmune hepatitis (AIH) cases were defined by a first-time CPRD registration of a Read code for AIH, as we previously validated2 or by HES registration of an ICD-10 diagnosis for AIH (Supplementary Table 1) between 1 January 2005 and 31 July 2017. The AIH diagnosis date was the date of the first Read code or ICD code for AIH. We included patients aged 18 years or older at the time of AIH diagnosis, and we only included those with an AIH diagnosis date prior to date of death. We excluded cases who at any time between 1 January 2005 and 31 July 2017 were coded with a Read code or an ICD code compatible with alcoholic fibrosis, alcoholic cirrhosis, or viral hepatitis B or C, a positive test result for viral hepatitis B or C, or an antiviral treatment for hepatitis B or C (entecavir, lamivudine, adefovir dipivoxil, interferon alfa, telbivudine, ribavirin, or tenofovir). We also excluded patients who at any time during follow-up were registered with a Read code or an ICD code compatible with another autoimmune liver disease, i.e., primary sclerosing cholangitis or primary biliary cholangitis. (Supplementary Table 1). We applied these exclusion criteria to increase the validity of the AIH diagnoses.

For each case with AIH, we randomly selected up to 10 controls from the identified CPRD population who were alive and without an AIH diagnosis before the end of study on 31 July 2017. The controls were matched with the cases by the method of frequency matching for sex, 20-year age group, (18-39 years, 40-59 years, 60-79 years, ≥80 years), general practice, and calendar year for registration with the general practice. The controls were allocated a pseudo-diagnosis date randomly selected between 1 January 2005 and 31 July 2017.

We categorised the AIH cases and the controls as to exposure of smoking based on the last CPRD record of smoking status before the AIH diagnosis or pseudo-diagnosis date and after the time of registration with the general practice and after the up-to-standard time. We defined two categories of smoking exposure: ‘ever-smokers’, ie patients who were recorded as smokers or ex-smokers in the period between registration with the general practice (and after up-to-standard) and the AIH diagnosis date; and ‘never-smokers’, ie patients who were recorded as non-smokers in the last record before the diagnosis or pseudo-diagnosis date *and* who were never recorded as smokers or ex-smokers in the period between registration with the general practice (and after up-to-standard) and the diagnosis date. This way, a patient, who was previously recorded as a smoker but later as a non-smoker, would be categorised as an ‘ex-smoker’. Information on smoking status was obtained by a validated method of using three sources from the CPRD dataset:3 Read codes related to smoking in clinical and referral files, records of smoking status in additional files, and prescriptions for smoking cessation in therapy files (Supplementary Table 2).

We used logistic regression to compare the odds of AIH in ‘ever-smokers’ and ‘never-smokers’. We examined variations in the effect of smoking on the odds of AIH by stratified categories of sex (men and women), age groups (20-year age categories), and person-level IMD (quintiles). We obtained the adjusted odds ratio of AIH in ‘ever-smokers’ vs. ‘never-smokers’ by fitting a multiple logistic regression model including the frequency matching variables (sex, 20-year age categories, general practice, and calendar time for registration with the general practice) and also adjusting for person-level IMD (quintiles) and age (continuous variable). We used the likelihood ratio test to test for interaction between smoking and sex, age group, calendar year, and IMD, respectively. Estimates were given with 95% confidence intervals assuming independent samples from binomial distributions.

We used different approaches to deal with missing data on smoking: Firstly, we conducted the odds ratio analysis as a complete-case analyses, excluding persons with missing data. Secondly, we conducted the odds ratio analysis using multivariable imputation by chained equations to impute missing values in the dataset assuming that missing data were missing at random conditional on the observed data. We imputed the variables with missing values, i.e., smoking status and quintile of IMD, using a multinomial logistic regression model and included the other variables of sex (categorical variable), age (continuous variable), regional affiliation (categorical variable), and outcome of AIH (categorical variable) in the regression model. We created 50 imputation-based datasets where missing information on smoking status and IMD was imputed. Estimates from multiple dataset were combined using Rubin’s rule.4

To evaluate if ascertainment bias in ‘ever-smokers’ could explain any higher risk of having an AIH diagnosis, we estimated the cumulative mortality after an AIH diagnosis in ‘ever-smokers’ and ‘never-smokers’ using the Kaplan Meier estimator of survival. If ‘ever-smokers’ were seen more regularly by their general practitioner and thereby were diagnosed at an earlier stage of AIH, they could have a better survival than otherwise expected.

All data management and analyses were carried out using MonetDB SQL and Stata software version 14.2.

**Supplementary Table 1.** **Read codes and International Classification of Diseases codes 10th edition (ICD-10) used for inclusion and exclusion.**

|  | **Read Codes** | **ICD-10 codes** |
| --- | --- | --- |
| **Autoimmune hepatitis** | J63B.00 autoimmune hepatitis  J614000 chronic persistent hepatitis  J614111 autoimmune chronic active hepatitis  J614100 chronic active hepatitis | K73.2 Chronic active hepatitis  K74.2 Autoimmune hepatitis |
| **Alcoholic fibrosis or cirrhosis** | J612000 Alcoholic fibrosis or sclerosis of liver | K70.2 Alcoholic liver fibrosis |
|  | J612.00 Alcoholic cirrhosis of liver | K70.3 Alcoholic liver cirrhosis |
|  | J617000 Chronic alcoholic hepatitis | K70.4 Alcoholic liver insufficiency |
| **Viral hepatitis** | A707.00 Chronic viral hepatitis | B18.x Chronic viral hepatitis |
|  | A707000 Chronic viral hepatitis B with delta-agent |  |
|  | A707100 Chronic viral hepatitis B without delta-agent |  |
|  | A707200 Chronic viral hepatitis C |  |
|  | A707X00 Chronic viral hepatitis, unspecified |  |
| **Other autoimmune liver diseases** | J616000 Primary biliary cirrhosis | K74.3 Primary biliary cirrhosis |
|  | J661700 Primary sclerosing cholangitis | K83.oF Primary sclerosing cholangitis |

**Supplementary Table 2. Read codes, read terms, product codes, and product names used for categorising autoimmune hepatitis cases and controls as ‘current-smoker’, ‘ex-smoker’ or ‘never-smoker’**

| **‘Smoker’** | **Read code** | **READ term** |
| --- | --- | --- |
|  | 9CAL.00 | Smoking cessation advice |
|  | 137P.11 | Smoker |
|  | 13p..00 | Smoking cessation milestones |
|  | 13p0.00 | Negotiated date for cessation of smoking |
|  | 13p8.00 | Lost to smoking cessation follow-up |
|  | 945Hz00 | Smoking cessation therapy NOS |
|  | 137..11 | Smoker – amount smoked |
|  | 745H.00 | Smoking cessation therapy |
|  | 137Q.00 | Smoking started |
|  | 137Q.11 | Smoking restarted |
|  | 137e.00 | Smoking restarted |
|  | 38DH.00 | Fagerstrom test for nicotine dependence |
|  | 67A3.00 | Pregnancy smoking advice |
|  | 8B2B.00 | Nicotine replacement therapy |
|  | 8B3f.00 | Nicotine replacement therapy provided free |
|  | 8BP3.00 | Over the counter nicotine replacement therapy |
|  | 8CAg.00 | Smoking cessation advice provided by community pharmacist |
|  | 8CdB.00 | Stop smoking service opportunity signposted |
|  | 8HBM.00 | Stop face to face follow-up |
|  | 8HkQ.00 | Referral to NHS stop smoking service |
|  | 8I2I.00 | Nicotine replacement therapy contradicted |
|  | 8I2J.00 | Bupropion contradicted |
|  | 8I39.00 | Nicotine replacement therapy refused |
|  | 8I3M.00 | Bupropion refused |
|  | 8I6H.00 | Smoking review not indicated |
|  | 8IAj.00 | Smoking cessation advice declined |
|  | 8IEK.00 | Smoking cessation program declined |
|  | 8IEM.00 | Smoking cessation drug therapy declined |
|  | 9hG..00 | Exception reporting: smoking quality indicators |
|  | 9hG0.00 | Excepted from smoking quality indicators: Patient unsuitable |
|  | 9hG1.00 | Excepted from smoking quality indicators: Informed dissent |
|  | 9kc0.00 | Smoking cessation monitor template completed – enhanced service administrator |
|  | 9ko..00 | Current smoker annual review – enhanced service administrator |
|  | 9N2k.00 | Seen by smoking cessation advisor |
|  | 9N4M.00 | DNA – did not attend smoking cessation clinic |
|  | 9Ndg.00 | Declined consent for follow-up by smoking cessation team |
|  | 9NdV.00 | Consent given follow-up after smoking cessation intervention |
|  | 9NdW.00 | Consent given for smoking cessation data sharing |
|  | 9NdY.00 | Declined consultation follow-up evaluation after smoking cessation intervention |
|  | 9NdZ.00 | Declined consent for smoking cessation data sharing |
|  | 9NS02 | Referral for smoking cessation service offered |
|  | 9kc..00 | Smoking cessation – advanced services administration |
|  | 1372.11 | Occasional smoker |
|  | 1372.00 | Trivial smoker - < 1 cig/day |
|  | 1373.00 | Light smoker – 1-9 cigs/day |
|  | 1374.00 | Moderate smoker – 10-19 cigs/day |
|  | 1375.00 | Heavy smoker – 20-39 cigs/day |
|  | 1376.00 | Very heavy smoker – 40+cigs/d |
|  | 137..00 | Tobacco consumption (value >1) |
|  | 137a.00 | Pipe tobacco consumption |
|  | 137b.00 | Ready to stop smoking |
|  | 137c.00 | Thinking about stopping smoking |
|  | 137C.00 | Keeps trying to stop smoking |
|  | 137d.00 | Not interesting in stopping smoking |
|  | 137D.00 | Admitted tobacco cons untrue? |
|  | 137E.00 | Tobacco consumption unknown |
|  | 137f.00 | Reason for restarting smoking |
|  | 137g.00 | Cigarette pack years (value > 1) |
|  | 137G.00 | Trying to give up smoking |
|  | 137h.00 | Minutes from waking to first tobacco consumption |
|  | 137H.00 | Pipe smoker |
|  | 137J.00 | Cigar smoker |
|  | 137m.00 | Failed attempt to stop smoking |
|  | 137M.00 | Rolls own cigarettes |
|  | 137P.00 | Cigarette smoker |
|  | 137R.00 | Current smoker |
|  | 137V.00 | Smoking reduced |
|  | 137X.00 | Cigarette consumption |
|  | 137Y.00 | Cigar consumption |
|  | 137Z.00 | Tobacco consumption NOS (value > 1) |
|  | 6791.00 | Health education – smoking |
|  | 67910 | Health education – parental smoking |
|  | 8H7i.00 | Referral to smoking cessation advisor |
|  | 9OO1.00 | Attends stop smoking monitor |
|  | 8HTK.00 | Referral to stop-smoking clinic |
|  | 9OO..12 | Stop smoking monitoring admin |
|  | 9OO4.00 | Stop smoking monitor 1st letter |
|  | 13p5.00 | Smoking cessation programme start date |
|  | 9OOZ.00 | Stop smoking monitor admin.NOS |
|  | 9OOA.00 | Stop smoking monitor.chck done |
|  | 9OOB.00 | Stop smoking invitation short message service text message |
|  | 9OOB1 | Stop smoking invitation second short message service text message |
|  | 9OOB2 | Stop smoking invitation third short message service text message |
|  | 67H1.00 | Lifestyle advice regarding smoking |
|  | 67H6.00 | Brief cessation for smoking cessation |
|  | 9OO..00 | Attends stop smoking monitor administrator |
|  | 9OO2.00 | Refuses stop smoking monitor |
|  | J0364 | Tobacco deposit on teeth |
|  | SMC..00 | Toxic effect of tobacco and nicotine |
|  | TJHy2 | Adverse reaction to nicotine |
|  | U6099 | Bupropion causing adverse effects in therapeutics use |
|  | ZV4K0 | Tobacco use |
|  | ZV6D8 | Tobacco use counselling |
|  | 9OO3.00 | Stop smoking monitor default |
|  | 9OO8.00 | Stop smoking monitor phone inv |
|  | 9OO7.00 | Stop smoking monitor verb.inv. |
|  | 745H400 | Smoking cessation drug therapy |
|  | 8HkQ.00 | Referral to NHS stop smoking service |
|  | 9OO5.00 | Stop smoking monitor 2nd letter |
|  | 9OO6.00 | Stop smoking monitor 3rd letter |
|  | 8HBM.00 | Stop smoking face to face follow-up |
|  | E023.00 | Nicotine withdrawal |
|  | E251z00 | Tobacco dependence NOS |
|  | E251100 | Tobacco dependence, continuous |
|  | E251300 | Tobacco dependence in remission |
|  | E251000 | Tobacco dependence, unspecified |
|  | 745H.00 | Smoking cessation therapy |
|  | 745H000 | Nicotine replacement therapy using nicotine patches |
|  | 745H200 | Nicotine replacement therapy using nicotine inhalator |
|  | 745H100 | Nicotine replacement therapy using nicotine gum |
|  | 745H300 | Nicotine replacement therapy using nicotine lozenges |
|  | 745Hz00 | Smoking cessation therapy NOS |
|  | 745H400 | Smoking cessation drug therapy |
|  | 745Hy00 | Other specified smoking cessation therapy |
| **’Smoker’** | **Product code** | **Product name** |
|  | 467 | ZYBAN modified release tablet 150mg [GLAXO] |
|  | 1248 | NICORETTE nasal spray 10mg/ml [PHARMACIA] |
|  | 1703 | NICORETTE patch 15mg [PHARMACIA] |
|  | 2876 | NICORETTE chewing gum 2mg [PHARMACIA] |
|  | 3404 | NIQUITIN patch 21mg [GLAXSK CON] |
|  | 3818 | NICOTINELL TTS patch 30 square cm [NOVARTIS] |
|  | 4166 | NICORETTE chewing gum 4mg [PHARMACIA] |
|  | 4704 | NIQUITIN patch 7mg [GLAXSK CON] |
|  | 4717 | NIQUITIN patch 14mg [GLAXSK CON] |
|  | 5115 | bupropion modified release tablet 150mg |
|  | 5320 | NICORETTE inhalator cartridge 10mg [MCNEIL] |
|  | 5440 | NICORETTE patch 10mg [PHARMACIA] |
|  | 5457 | nicotine patch 5mg |
|  | 5479 | nicotine patch 10mg |
|  | 5502 | nicotine patch 15mg |
|  | 5515 | nicotine sugar free lozenge 1mg |
|  | 5531 | NICOTINELL lozenge 1mg [NOVARTIS] |
|  | 5606 | NICOTINELL TTS patch 20 square cm [NOVARTIS] |
|  | 5659 | NIQUITIN lozenge 4mg [GLAXSK CON] |
|  | 5700 | NIQUITIN lozenge 2mg [GLAXSK CON] |
|  | 5758 | nicotine chewing gum 4mg |
|  | 5784 | nicotine sugar free lozenge 4mg |
|  | 5877 | NICORETTE microtab 2mg [PHARMACIA] |
|  | 5944 | nicotine cartridge - (for inhalation) 10mg |
|  | 5946 | NICOTINELL chewing gum 2mg [NOVARTIS] |
|  | 6018 | NICORETTE patch 5mg [PHARMACIA] |
|  | 6323 | nicotine chewing gum 2mg |
|  | 6448 | nicotine patch 21mg |
|  | 6565 | NIQUITIN chewing gum 2mg [GLAXSK CON] |
|  | 6593 | NIQUITIN MINT lozenge 4mg [GLAXSK CON] |
|  | 6630 | NIQUITIN MINT lozenge 2mg [GLAXSK CON] |
|  | 6642 | NIQUITIN chewing gum 4mg [GLAXSK CON] |
|  | 6698 | NICOTINELL MINT lozenge 2mg [NOVARTIS] |
|  | 7303 | NICOTINELL TTS patch 10 square cm [NOVARTIS] |
|  | 7644 | NICABATE patch 21mg [MERRELL] |
|  | 8571 | nicotine nasal spray 10mg/ml |
|  | 8912 | NICOBREVIN capsules [ASPAR] |
|  | 9591 | nicotine patch 14mg |
|  | 9804 | nicotine patch 7mg |
|  | 9806 | nicotine sugar free lozenge 2mg |
|  | 10527 | NICABATE patch 14mg [MERRELL] |
|  | 10623 | NICABATE patch 7mg [MERRELL] |
|  | 11718 | nicotine sublingual tablets 2mg |
|  | 13048 | NICOTINELL chewing gum 4mg [NOVARTIS] |
|  | 25510 | nicotine mint flavour chewing gum 2mg |
|  | 25516 | nicotine mint flavour chewing gum 4mg |
|  | 25523 | NICORETTE mint flavour chewing gum 2mg [PHARMACIA] |
|  | 27311 | NICONIL patch 22mg/24 hr [ELANPHARMA] |
|  | 27410 | CHAMPIX film coated tablets 500micrograms + 1mg [PFIZER] |
|  | 27411 | CHAMPIX film coated tablets 1mg [PFIZER] |
|  | 27412 | varenicline tablets 500micrograms + 1mg |
|  | 27414 | varenicline tablets 1mg |
|  | 29680 | NICONIL patch 11mg/24 hr [ELANPHARMA] |
|  | 31939 | NICORETTE mint plus chewing gum 4mg [PHARMACIA] |
|  | 33392 | nicotine patch 22mg/24 hr |
|  | 35035 | CHAMPIX film coated tablets 500 micrograms [PFIZER] |
|  | 35089 | varenicline tablets 500 micrograms |
|  | 36457 | NICOPATCH patch 21mg/24 hours [WOCKHARDT] |
|  | 36618 | NICOPATCH patch 7mg/24 hours [WOCKHARDT] |
|  | 36635 | NICOPATCH patch 14mg/24 hours [WOCKHARDT] |
|  | 37646 | nicotine sugar free lozenge 1.5mg |
|  | 37716 | NICOPASS lozenge 1.5mg [WOCKHARDT] |
|  | 38958 | NICOTINELL MINT lozenge 1mg [NOVARTIS] |
|  | 39046 | NICORETTE INVISI patch 25mg [MCNEIL] |
|  | 39123 | nicotine patch 25mg |
|  | 39166 | NICORETTE INVISI patch 15mg [MCNEIL] |
|  | 39521 | NIQUITIN PRE-QUIT MINT lozenge 4mg [GLAXSK CON] |
|  | 39572 | NICORETTE INVISI patch 10mg [MCNEIL] |
|  | 40617 | NICOTINELL 20 TTS patch 14mg/24 hours [NOVARTIS] |
|  | 40620 | NICOTINELL 30 TTS patch 21mg/24 hours [NOVARTIS] |
|  | 40683 | NICOTINELL 10 TTS patch 7mg/24 hours [NOVARTIS] |
|  | 40730 | NIQUITIN MINIS MINT lozenge 1.5mg [GLAXSK CON] |
|  | 40865 | NIQUITIN MINIS MINT lozenge 4mg [GLAXSK CON] |
|  | 41040 | NICORETTE LEMON microtab 2mg [MCNEIL] |
|  | 41356 | NICORETTE microtab 2mg [MCNEIL] |
|  | 41368 | NIQUITIN patch 21mg [GLAXSK CON] |
|  | 41372 | NIQUITIN CLEAR patch 21mg [GLAXSK CON] |
|  | 41376 | NICORETTE patch 15mg [MCNEIL] |
|  | 41377 | NICORETTE chewing gum 2mg [MCNEIL] |
|  | 41425 | NICORETTE FRESHMINT chewing gum 4mg [MCNEIL] |
|  | 41426 | NIQUITIN patch 7mg [GLAXSK CON] |
|  | 41474 | NICORETTE patch 10mg [MCNEIL] |
|  | 41485 | NIQUITIN patch 14mg [GLAXSK CON] |
|  | 41493 | NICORETTE ICY WHITE chewing gum 4mg [MCNEIL] |
|  | 41496 | NICORETTE nasal spray 10mg/ml [MCNEIL] |
|  | 41505 | NIQUITIN CLEAR patch 14mg [GLAXSK CON] |
|  | 41507 | NIQUITIN CLEAR patch 7mg [GLAXSK CON] |
|  | 41753 | NICORETTE chewing gum 4mg [MCNEIL] |
|  | 41765 | NICOTINELL MINT chewing gum 2mg [NOVARTIS] |
|  | 41778 | NICORETTE FRESHFRUIT chewing gum 4mg [MCNEIL] |
|  | 41779 | NICORETTE ICY WHITE chewing gum 2mg [MCNEIL] |
|  | 41801 | NICORETTE FRESHMINT chewing gum 2mg [MCNEIL] |
|  | 41802 | NICORETTE patch 5mg [MCNEIL] |
|  | 41808 | NICOTINELL FRUIT chewing gum 4mg [NOVARTIS] |
|  | 41809 | NICORETTE MINT chewing gum 4mg [MCNEIL] |
|  | 41860 | nicotine bitartrate sublingual tablets 2mg |
|  | 41864 | NICORETTE FRESHFRUIT chewing gum 2mg [MCNEIL] |
|  | 41879 | NICOTINELL LIQUORICE chewing gum 2mg [NOVARTIS] |
|  | 41881 | NICOTINELL CLASSIC chewing gum 2mg [NOVARTIS] |
|  | 41909 | NICOTINELL MINT chewing gum 4mg [NOVARTIS] |
|  | 41923 | nicotine patch and gum 15mg + 2mg |
|  | 41931 | NICOTINELL FRUIT chewing gum 2mg [NOVARTIS] |
|  | 42011 | NICOTINELL CLASSIC chewing gum 4mg [NOVARTIS] |
|  | 42016 | NICORETTE MINT chewing gum 2mg [MCNEIL] |
|  | 42047 | NICOTINELL LIQUORICE chewing gum 4mg [NOVARTIS] |
|  | 42048 | nicotine bitartrate sugar free lozenge 1mg |
|  | 42221 | NICOTINE lozenge 4mg [TEVA] |
|  | 42286 | nicotine bitartrate sugar free lozenge 2mg |
|  | 42400 | NICORETTE COMBI patch and gum [MCNEIL] |
| **’Ex-smoker’** | **Read code** | **READ term** |
|  | 1377.00 | Ex-trivial smoker (<1/day) |
|  | 1378.00 | Ex-light smoker |
|  | 1379.00 | Ex-moderate smoker (10-19/day) |
|  | 137A.00 | Ex-heavy smoker (20-39/day) |
|  | 137B.00 | Ex-very heavy smoker (40+/day) |
|  | 137F.00 | Ex-smoker – amount unknown |
|  | 137i.00 | Ex-tobacco chewer |
|  | 137j.00 | Ex-cigarette smoker |
|  | 137K.00 | Stopped smoking |
|  | 137l.00 | Ex roll-up cigarette smoker |
|  | 137L.00 | Current non-smoker |
|  | 137N.00 | Ex pipe smoker |
|  | 137O.00 | Ex cigar smoker |
|  | 137T.00 | Date ceased smoking |
|  | 137S.00 | Ex smoker |
|  | 137K0 | Recently stopped smoking |
|  | 9km..00 | Ex-smoker annual review |
|  | 13p4 | Smoking free weeks |
| **’Never-smoker’** | **Read Code** | **Read term** |
|  | 1371.00 | Never-smoked tobacco |
|  | 1371.11 | non-smoker |
|  | 9kn..00 | Non-smoker annual review |

**References**

1. Herrett E, Gallagher AM, Bhaskaran K, et al. Data Resource Profile: Clinical Practice Research Datalink (CPRD). *Int J Epidemiol.* 2015;44:827-36.

2. Varyani F, Card T, Kaye P, et al. The communication of a secondary care diagnosis of autoimmune hepatitis to primary care practitioners: a population-based study. *BMC Health Serv Res*. 2013;13:161.

3. Booth HP, Prevost AT, Gulliford MC. Validity of smoking prevalence estimates from primary care electronic health records compared with national population survey data for England, 2007 to 2011. *Pharmacoepidemiol Drug Saf*. 2013;22:1357-61.

4. White IR, Royston P, Wood AM. Multiple imputation using chained equations: Issues and guidance for practice. *Stat Med*. 2011;30:377-99.
